# Supplementary material for: Clinical-transcriptional prioritization of the circulating proteome in human heart failure
Source: PubMed Central journal article supplement — Cell Rep Med. 2024 Sep 2;5(9):101704. doi: 10.1016/j.xcrm.2024.101704 (PMC11524958; doi:10.1016/j.xcrm.2024.101704), 2024-09-02
Supplement: mmc1.pdf [file mmc1.pdf]

**Cell Reports Medicine, Volume 5**

**Supplemental information**

**Clinical-transcriptional prioritization  
of the circulating proteome  
in human heart failure**

**Andrew S. Perry, Kaushik Amancherla, Xiaoning Huang, Michelle L. Lance, Eric Farber-Eger, Priya Gajjar, Junedh Amrute, Lindsey Stolze, Shilin Zhao, Quanhu Sheng, Cassandra M. Joynes, Zhongsheng Peng, Toshiko Tanaka, Stavros G. Drakos, Kory J. Lavine, Craig Selzman, Joseph R. Visker, Thirupura S. Shankar, Luigi Ferrucci, Saumya Das, Jane Wilcox, Ravi B. Patel, Ravi Kalhan, Sanjiv J. Shah, Keenan A. Walker, Quinn Wells, Nathan Tucker, Matthew Nayor, Ravi V. Shah, and Sadiya S. Khan**

SUPPLEMENTARY MATERIAL FOR Perry et al. *Clinical-transcriptional prioritization of the circulating proteome in human heart failure*

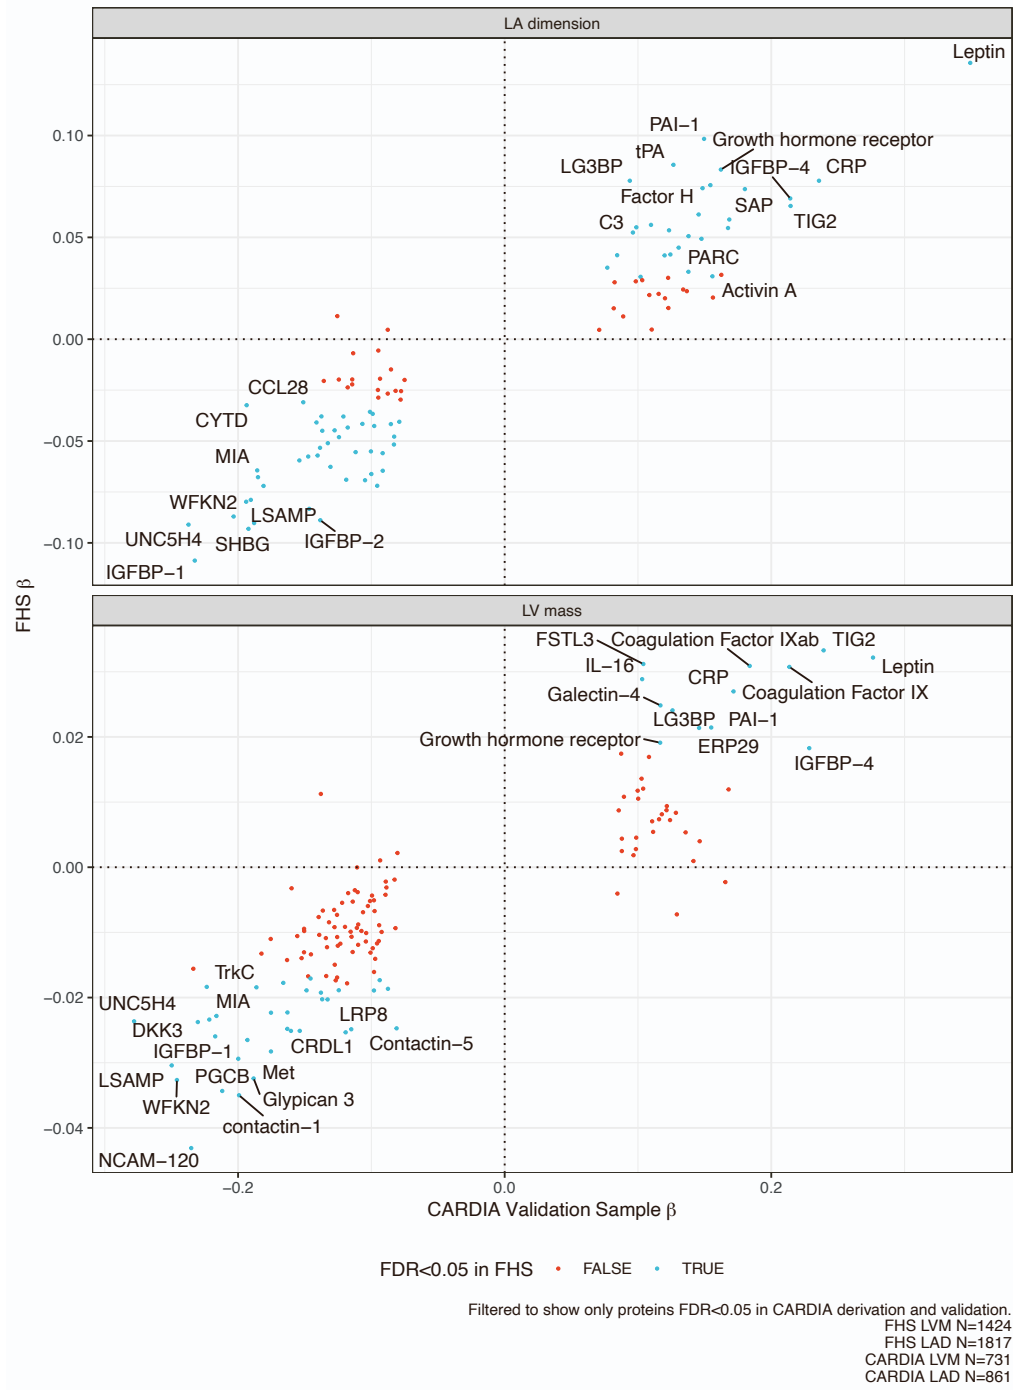

**Supplementary Figure 1: Proteomic correlates of left atrial dimension and left ventricular mass replicate in FHS.** Proteins associated with either left atrial dimension or LV mass in CARDIA (at a 5% FDR in both CARDIA derivation and validation samples) after adjustment for age, gender, and race are included. Relations appear consistent across CARDIA and FHS. Related to **Figure 2**.

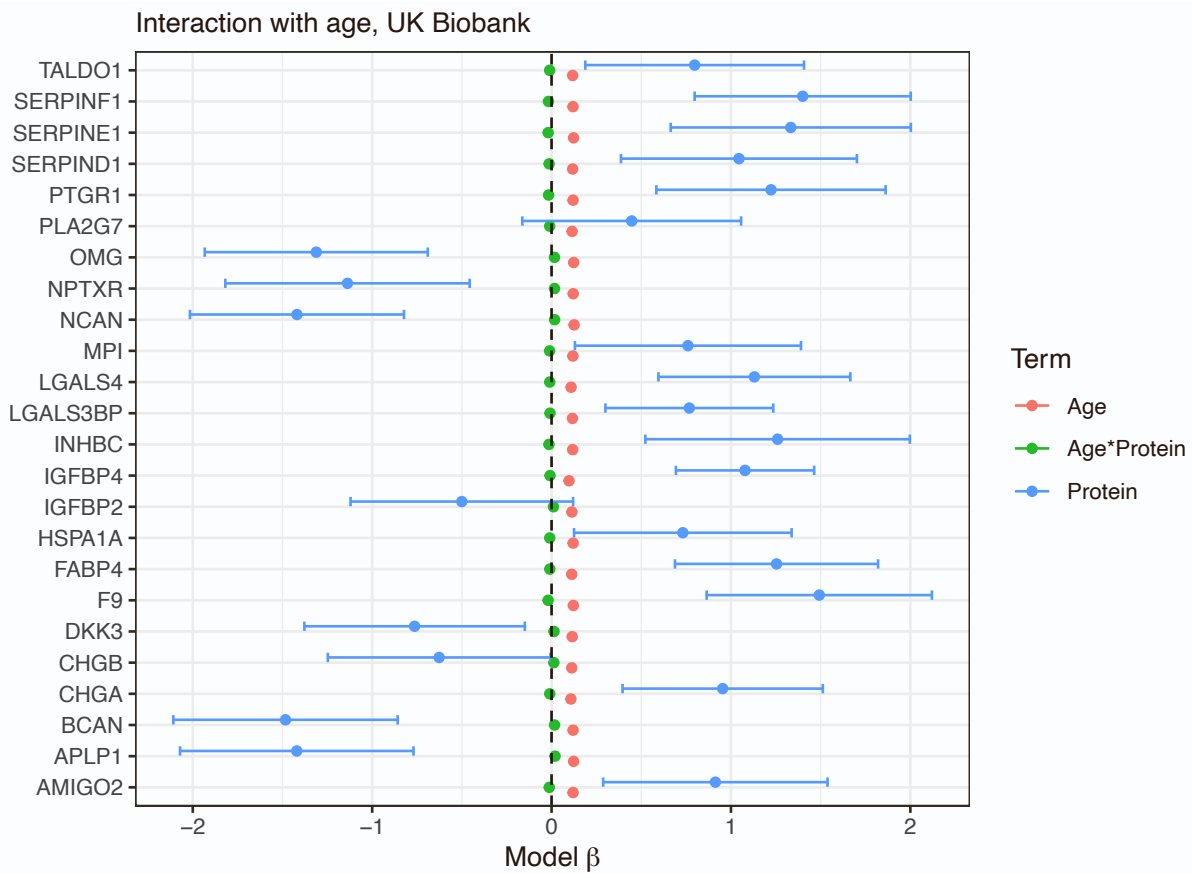

**Supplementary Figure 2:** Proteomic associations with incident HF in UK Biobank with effect modification by age.

Forest plot of Cox model coefficients with their 95% confidence interval demonstrate a very weak interaction

between proteins and age. Related to **Figure 3**.
